# Supplementary material for: The Salmonella Effector SpvD Is a Cysteine Hydrolase with a Serovar-specific Polymorphism Influencing Catalytic Activity, Suppression of Immune Responses, and Bacterial Virulence
Source: PubMed Central journal article supplement (PMC5207060; doi:10.1074/jbc.m116.752782), 2016-10-27
Supplement: 10.1074_M116.752782_jbc.M116.752782-1.pdf [file 10.1074_M116.752782_jbc.M116.752782-1.pdf]

**Table S1.** Strains and plasmids used in this study

| Name                                             | Description                                                                                                     | Reference              |
|--------------------------------------------------|-----------------------------------------------------------------------------------------------------------------|------------------------|
| <b>Strains</b>                                   |                                                                                                                 |                        |
| <i>S. Typhimurium</i>                            |                                                                                                                 |                        |
| $\Delta spvD$                                    | 12023 $\Delta spvD$                                                                                             | (11)                   |
| $\Delta spvD$ , pACYC ( <i>EV</i> )              | $\Delta spvD$ pACYC                                                                                             | This study             |
| $\Delta spvD$ , pACYCspvD <sup>R161</sup>        | $\Delta spvD$ pACYCspvD <sup>R161</sup>                                                                         | (11)                   |
| $\Delta spvD$ , pACYCspvD <sup>R161/C73A</sup>   | $\Delta spvD$ pACYCspvD <sup>R161/C73A</sup>                                                                    | This study             |
| $\Delta spvD$ , pACYCspvD <sup>G161</sup>        | $\Delta spvD$ pACYCspvD <sup>G161</sup>                                                                         | This study             |
| $\Delta spvD$ , pACYCspvD <sup>G161/C73A</sup>   | $\Delta spvD$ pACYCspvD <sup>G161/C73A</sup>                                                                    | This study             |
| $\Delta spvD$ , pWSK29 ( <i>EV</i> )             | $\Delta spvD$ pWSK29                                                                                            | This study             |
| $\Delta spvD$ , pspvD <sup>R161</sup> -2HA       | $\Delta spvD$ pWSK29spvD <sup>R161</sup> -2xHA                                                                  | This study             |
| $\Delta spvD$ , pspvD <sup>R161/C73A</sup> -2xHA | $\Delta spvD$ pWSK29spvD <sup>R161/C73A</sup> -2xHA                                                             | This study             |
| $\Delta spvD$ , pspvD <sup>G161</sup> -2xHA      | $\Delta spvD$ pWSK29spvD <sup>G161</sup> -2xHA                                                                  | This study             |
| $\Delta spvD$ , pspvD <sup>G161/C73A</sup> -2xHA | $\Delta spvD$ pWSK29spvD <sup>G161/C73A</sup> -2xHA                                                             | This study             |
| <i>E. coli</i>                                   |                                                                                                                 |                        |
| DH5 $\alpha$                                     | wt                                                                                                              | NCTC                   |
| BL21(DE3)                                        | wt                                                                                                              | NCTC                   |
| PC2                                              | wt                                                                                                              | (29)                   |
| <b>Plasmids</b>                                  |                                                                                                                 |                        |
| pET22b                                           | Protein expression vector used for expression and purification of SpvD and SpvC proteins                        | Merck Millipore        |
| pHiSH                                            | Protein expression vector with precision protease cleavable His-tag for expressing proteins for crystallography | (28)                   |
| pACYC184                                         | Rep <sub>p15A</sub> low copy number vector                                                                      | (43)                   |
| pACYCspvD and mutant derivatives                 | pACYC184 with <i>spvD</i> cloned into <i>EcoRV</i> and <i>Sall</i> sites, Cm <sup>R</sup>                       | This study             |
| pGEX-4T-2sseL                                    | GST fused to sseL                                                                                               | (22)                   |
| pWSK29SpvD-2xHA and mutant derivatives           | pWSK29 with <i>spvD</i> containing C-terminal 2xHA tag, Amp <sup>R</sup>                                        | This study             |
| pRK5-myc                                         | Eukaryotic expression vector                                                                                    | Laboratory stock       |
| pRK5-myc-SpvD and mutant derivatives             | pRK5 with N-terminal myc-tagged SpvD cloned into <i>BamHI</i> and <i>EcoRI</i> sites, Amp <sup>R</sup>          | This study             |
| ptCMV-IkB $\alpha$ <sup>S32A/S36A</sup>          | Positive NF- $\kappa$ B inhibition protein                                                                      | Laboratory stock       |
| ptCMV-GFP-SseK3                                  | GFP-fused effector known to inhibit NF- $\kappa$ B in TNF $\alpha$ stimulated cells                             | Laboratory stock       |
| M <sub>3</sub> psinrev $\kappa$ B- <i>luc</i>    | <i>luc</i> gene under control of NF- $\kappa$ B consensus promoter                                              | Gift from Felix Randow |
| pRLTK                                            | constitutively active Renilla luciferase                                                                        | Gift from Felix Randow |



**Figure S1.** Amino acid alignment of SpvD sequences.

The alignment was prepared using BioEdit software (<http://www.mbio.ncsu.edu/bioedit/bioedit.html>). The protein BLAST search was performed with BLASTP 2.2.29+ software (BLOSUM62 matrix; E threshold= 1.0) using *S. Typhimurium* 14028s SpvD input sequence (<http://www.uniprot.org/uniprot/A0A0F6AW50>). Sequences lacking a significant portion of the protein or the catalytic triad components were omitted. Polymorphisms are highlighted in yellow and catalytic triad positions are marked with red asterisks.

SpvD<sup>4CS/R161</sup>

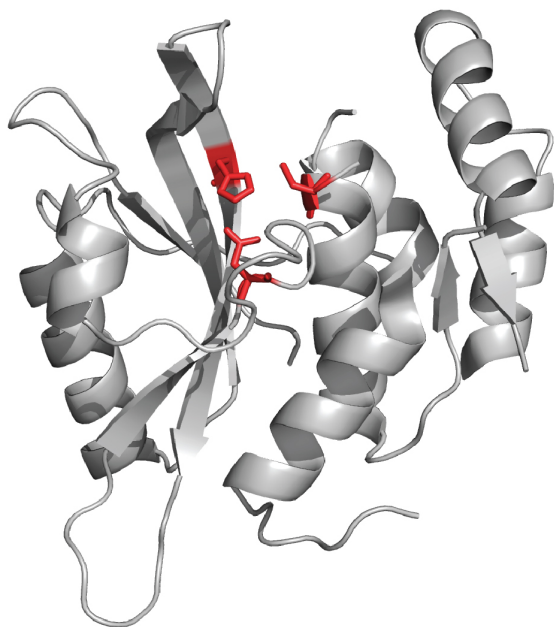

SpvD<sup>4CS/G161/C73A</sup>

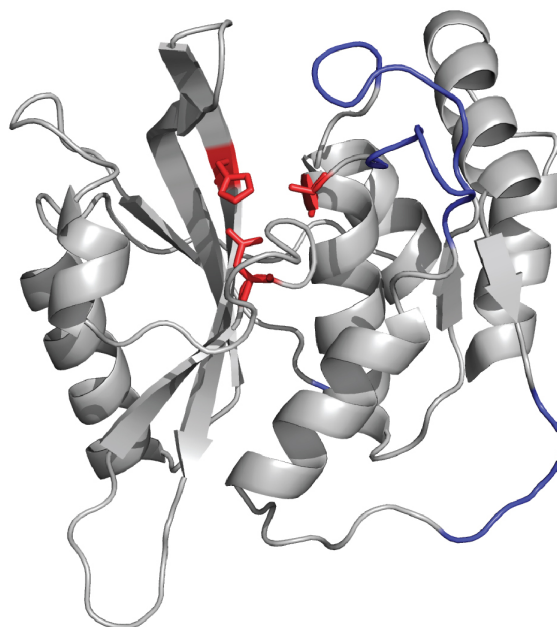

**Figure S2.** Comparison of SpvD<sup>4CS/A154/R161</sup> and SpvD<sup>4CS/A154/G161/C73A</sup> structures. Catalytic triad residues are represented with red sticks. Additional loop regions that were mapped in SpvD<sup>4CS/A154/G161/C73A</sup> structure (right) are coloured in blue.
